# Supplementary material for: RFID Technology Serving Honey Bee Research: A Comprehensive Description of a 32-Antenna System to Study Honey Bee and Queen Behavior
Source: MDPI journal article supplement (doi:10.3390/asi4040088), 2021-11-09
Supplement: s1 [file s1]

Archive with 1 entries (1 files):
- asi-1414876-supplementary.pdf
